# Supplementary material for: How does an acute palliative care unit work in a comprehensive cancer center?
Source: Research Square preprint supplement (doi:10.21203/rs.3.rs-6638128/v1), 2025-06-25
Supplement: Supplementary file 1 [file 13b5f9878e0fad60337067f4.docx]

Table 1. Characteristics of patients.

Patients (n°) 519

Age (yrs, mean SD) 67.7(11.6)

Gender (M/F) 248/271

Karnofsky (mean SD) 43.1 (10.2)

Primary tumor

Lung 159

Breast 65

Genitourinary 59

Gastrointestinal 164

Hematologic 5

Head-neck 4

Unknown 8

Other 29

*Referral Discharge*

Home 348 208

Home palliative care 75 109

Hospice 112

Surgery unit 39 1

Oncology unit 30 4

Other hospitals 25 14

Hematology unit 3

Long staying 11

Radiotherapy 1

Died in APCU 60

*Treatments in the previous 30 days*

Chemotherapy 182

Target therapy 11

Immunotherapy 7

Hormonal therapy 7

Radiotherapy 6

*Proposed anticancer treatments*

*Admission Discharge*

On 213 145

Off 144 270

Uncertain 39 45

Naïve 97

Total data available 493 460
