# Supplementary material for: How does an acute palliative care unit work in a comprehensive cancer center?
Source: Research Square preprint supplement (doi:10.21203/rs.3.rs-6638128/v1), 2025-06-25
Supplement: Supplementary file 2 [file e18f8dcadf2aeea3bde88253.docx]

Table 2. Mean symptom intensity at admission (T0) and at discharge (TX). *Wilcoxon test

|  | Mean (SD) T0 | Mean (SD) TX | P* |
| --- | --- | --- | --- |
| Pain | 3.8 (2.8) | 1.7 (1.8) | <0.0005 |
| Dyspnea | 1.2 (2.1) | 0.5 (1.3) | <0.0005 |
| Anxiety | 2.9 (3.0) | 1.3(2.1) | <0.0005 |
| Depression | 2.3 (3.0) | 1.1(2.1) | <0.0005 |
| Poor sleep | 3.9 (3.2) | 1.9 (2.5) | <0.0005 |
| Drowsiness | 2.7 (2.6) | 1.7(2.1) | <0.0005 |
| Nausea | 1.0 (2.1) | 0.3(1.1) | <0.0005 |
| Poor appetite | 3.9 (3.3) | 2.1(2.7) | <0.0005 |
| Weakness | 5.7 (2.8) | 3.4(2.6) | <0.0005 |
| Poor well-being | 4.9 (2.9) | 2.7 (2.5) | <0.0005 |
| Global ESAS | 32.2(14.5) | 16.7(12.4) | <0.0005 |
